# Supplementary material
Source: Springer Nature journal article supplement (https://www.springermedizin.de/resource/supplementary/12885_2013_4097_MOESM5_ESM.pdf/9465330)

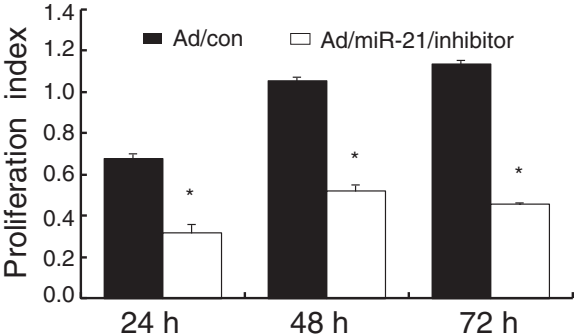

Supplement: MOESM5 [file 9465330]
